# Supplementary material for: Association Between Diabetes and Major Bleeding Complications of Renal Biopsy
Source: PubMed Central journal article supplement — Kidney Int Rep. 2021 Nov 25;7(2):232–40. doi: 10.1016/j.ekir.2021.11.013 (PMC8821035; doi:10.1016/j.ekir.2021.11.013), 2021-11-25
Supplement: mmc1.pdf [file mmc1.pdf]

## Supplementary materials for “Association between diabetes and major bleeding complications of renal biopsy”

### **Table of contents**

**Figure S1.** Trend in the proportion of renal biopsies for patients with diabetes

**Table S1.** Multivariable regression analysis for massive red blood cell transfusion

**Figure S2.** Cubic spline estimation of body mass index and relative risk of massive red blood cell transfusion

**Table S2.** Baseline characteristics of patients with and without diabetes (when patients with anemia defined using *ICD-10* codes on admission were excluded)

**Table S3.** Major bleeding complications of patients with and without diabetes (when patients with anemia defined using *ICD-10* codes on admission were excluded)

**Table S4.** Multivariable regression analysis for major bleeding complications (when patients with anemia defined using *ICD-10* codes on admission were excluded)

**Figure S3.** Cubic spline estimation of body mass index and relative risk of major bleeding complications (when patients with anemia defined using *ICD-10* codes on admission were excluded)

**Table S5.** Baseline characteristics of patients with and without diabetes (when diabetes was defined using *ICD-10* codes)

**Table S6.** Major bleeding complications of patients with and without diabetes (when diabetes was defined using *ICD-10* codes)

**Table S7.** Multivariable regression analysis for major bleeding complications (when diabetes was defined using *ICD-10* codes)

**Figure S4.** Cubic spline estimation of body mass index and relative risk of major bleeding complications (when diabetes was defined using *ICD-10* codes)

**Table S8.** Baseline characteristics of the subgroups of patients with diabetes

**Table S9.** Multivariable regression analysis for major bleeding complications in the subgroup of patients with diabetes

**Figure S5.** Cubic spline estimation of body mass index and relative risk of major bleeding complications in patients with diabetes

**Figure S1. Trend in the proportion of renal biopsies for patients with diabetes**

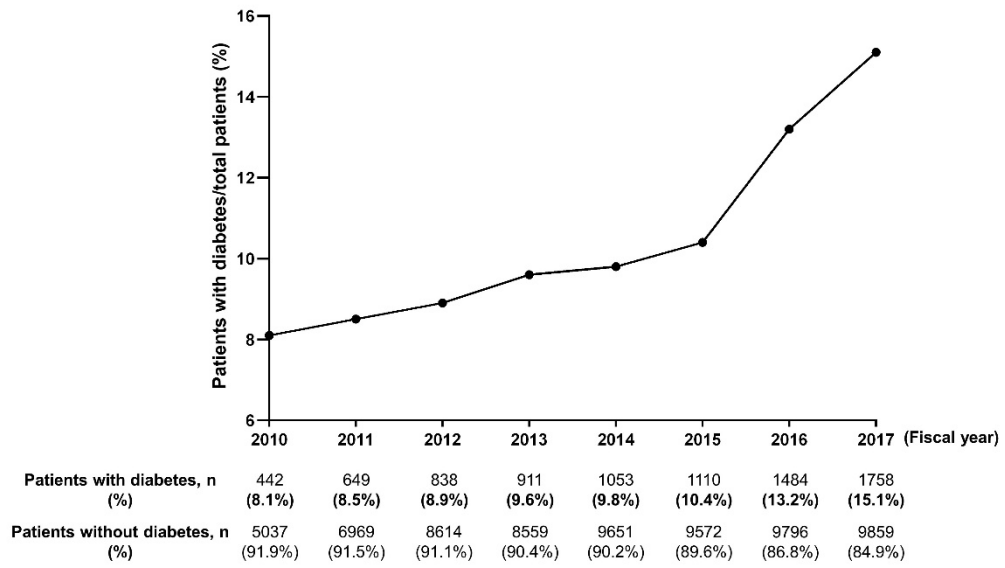

The horizontal axis denotes the fiscal year, and the vertical axis denotes the proportion of renal biopsies that were performed for patients with diabetes in each year.

**Table S1. Multivariable regression analysis for massive red blood cell transfusion**

| Generalized Estimating Equations<br>(Group variable: hospital code) | Multivariable Analysis |         |
|---------------------------------------------------------------------|------------------------|---------|
|                                                                     | RR (95% CI)            | p-value |
| <b>Diabetes mellitus</b>                                            | 7.47 (5.25-10.63)      | < 0.001 |
| <b>Age, years</b>                                                   | 1.03 (1.02-1.04)       | < 0.001 |
| <b>Female, sex</b>                                                  | 1.19 (0.90-1.58)       | 0.22    |
| <b>BMI (kg/m<sup>2</sup>)</b>                                       | See Figure S2          |         |
| <b>Main diagnosis</b>                                               |                        |         |
| AKI or RPGN                                                         | 3.38 (2.27-5.04)       | < 0.001 |
| Nephrosis                                                           | 1.22 (0.83-1.81)       | 0.31    |
| Others                                                              | 1 (base)               |         |
| <b>Presence of CKD</b>                                              | 2.25 (1.62-3.12)       | < 0.001 |
| <b>Hospital volume</b>                                              |                        |         |
| 1–24/year                                                           | 1 (base)               |         |
| 25–44/year                                                          | 0.75 (0.52-1.11)       | 0.15    |
| ≥ 45/year                                                           | 0.75 (0.50-1.13)       | 0.17    |
| <b>Academic hospital</b>                                            | 1.75 (1.21-2.53)       | 0.003   |
| <b>Fiscal year period</b>                                           |                        | 0.001   |
| 2010–2015                                                           | 1 (base)               |         |
| 2016–2017                                                           | 0.57 (0.41-0.81)       |         |
| <b>ADL</b>                                                          |                        | < 0.001 |
| Dependent                                                           | 3.47 (2.35-5.13)       |         |
| Independent                                                         | 1 (base)               |         |
| <b>Corticosteroid use</b>                                           | 1.59 (0.997-2.55)      | 0.052   |
| <b>Immunosuppressant use</b>                                        | 0.48 (0.065-3.48)      | 0.47    |
| <b>Antithrombotic use</b>                                           | 1.57 (0.83-3.00)       | 0.17    |

Abbreviations: RR, relative risk; BMI, body mass index (calculated as weight in kilograms divided by the square of height in meters); AKI, acute kidney injury; RPGN, rapidly progressive glomerulonephritis; ADL, activities of daily living.

**Figure S2. Cubic spline estimation of body mass index and relative risk of massive red blood cell transfusion**

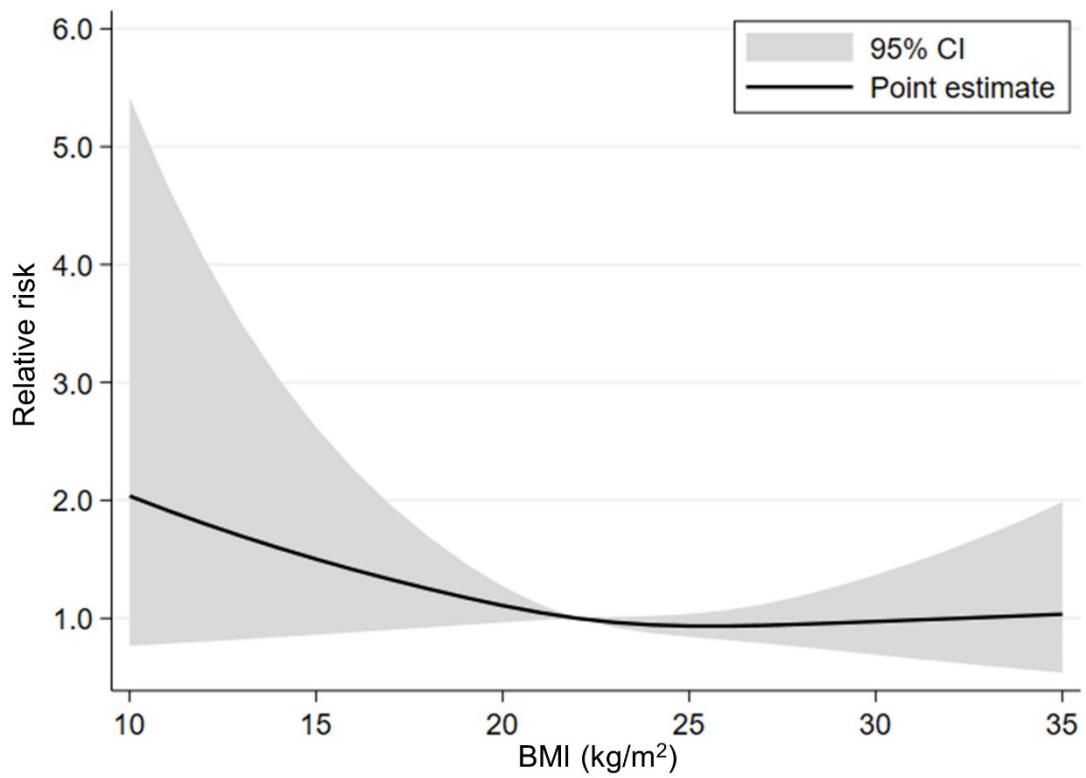

The horizontal axis denotes the body mass index (BMI, kg/m<sup>2</sup>), and the vertical axis denotes the relative risk of massive red blood cell transfusion.

**Table S2. Baseline characteristics of patients with and without diabetes (when patients with anemia defined using ICD-10 codes on admission were excluded)**

|                                     | Total patients<br>(n = 73632) | Patients without<br>diabetes<br>(n = 65758) | Patients with<br>diabetes<br>(n = 7874) | p-value |
|-------------------------------------|-------------------------------|---------------------------------------------|-----------------------------------------|---------|
| <b>Age, years</b>                   | 50 (34–65)                    | 48 (33–63)                                  | 65 (55–72)                              | < 0.001 |
| <b>Male, n (%)</b>                  | 38683 (52.5%)                 | 33866 (51.5%)                               | 4817 (61.2%)                            | < 0.001 |
| <b>BMI (kg/m<sup>2</sup>)</b>       |                               |                                             |                                         | < 0.001 |
| BMI < 18.5, n (%)                   | 6093 (8.3%)                   | 5694 (8.7%)                                 | 399 (5.1%)                              |         |
| 18.5 ≤ BMI < 23.0, n (%)            | 31561 (42.9%)                 | 28954 (44.0%)                               | 2607 (33.1%)                            |         |
| 23.0 ≤ BMI < 25.0, n (%)            | 13875 (18.8%)                 | 12257 (18.6%)                               | 1618 (20.5%)                            |         |
| 25.0 ≤ BMI < 30.0, n (%)            | 17130 (23.3%)                 | 14709 (22.4%)                               | 2421 (30.7%)                            |         |
| BMI ≥ 30.0, n (%)                   | 4973 (6.8%)                   | 4144 (6.3%)                                 | 829 (10.5%)                             |         |
| <b>Main diagnosis</b>               |                               |                                             |                                         | < 0.001 |
| AKI or RPGN, n (%)                  | 3185 (4.3%)                   | 2241 (3.4%)                                 | 944 (12.0%)                             |         |
| Nephrosis, n (%)                    | 13301 (18.1%)                 | 10501 (16.0%)                               | 2800 (35.6%)                            |         |
| Others, n (%)                       | 57146 (77.6%)                 | 53016 (80.6%)                               | 4130 (52.5%)                            |         |
| <b>Presence of CKD, n (%)</b>       | 8345 (11.3%)                  | 6886 (10.5%)                                | 1459 (18.5%)                            | < 0.001 |
| <b>Hospital volume per year</b>     |                               |                                             |                                         | 0.38    |
| 1–24 cases, n (%)                   | 27833 (37.8%)                 | 24867 (37.8%)                               | 2966 (37.7%)                            |         |
| 25–44 cases, n (%)                  | 24324 (33.0%)                 | 21672 (33.0%)                               | 2652 (33.7%)                            |         |
| ≥ 45 cases, n (%)                   | 21475 (29.2%)                 | 19219 (29.2%)                               | 2256 (28.7%)                            |         |
| <b>Academic hospital, n (%)</b>     | 19095 (25.9%)                 | 17014 (25.9%)                               | 2081 (26.4%)                            | 0.29    |
| <b>Fiscal year period</b>           |                               |                                             |                                         | < 0.001 |
| 2010–2015, n (%)                    | 51628 (70.1%)                 | 46845 (71.2%)                               | 4783 (60.7%)                            |         |
| 2016–2017, n (%)                    | 22004 (29.9%)                 | 18913 (28.8%)                               | 3091 (39.3%)                            |         |
| <b>ADL</b>                          |                               |                                             |                                         | < 0.001 |
| Independent                         | 72550 (98.5%)                 | 64987 (98.8%)                               | 7563 (96.1%)                            |         |
| Dependent                           | 1082 (1.5%)                   | 771 (1.2%)                                  | 311 (3.9%)                              |         |
| <b>Corticosteroid use, n (%)</b>    | 2250 (3.1%)                   | 1666 (2.5%)                                 | 584 (7.4%)                              | < 0.001 |
| <b>Immunosuppressant use, n (%)</b> | 760 (1.0%)                    | 654 (1.0%)                                  | 106 (1.3%)                              | 0.004   |
| <b>Antithrombotic use, n (%)</b>    | 985 (1.3%)                    | 687 (1.0%)                                  | 298 (3.8%)                              | < 0.001 |

Abbreviations: BMI, body mass index (calculated as weight in kilograms divided by the square of height in meters); AKI, acute kidney injury; RPGN, rapidly progressive glomerulonephritis; ADL, activities of daily living.

**Table S3. Major bleeding complications of patients with and without diabetes (when patients with anemia defined using ICD-10 codes on admission were excluded)**

|                                            | <b>Total patients<br/>(n = 73632)</b> | <b>Patients without<br/>diabetes<br/>(n = 65758)</b> | <b>Patients with<br/>diabetes<br/>(n = 7874)</b> | <b>p-value</b> |
|--------------------------------------------|---------------------------------------|------------------------------------------------------|--------------------------------------------------|----------------|
| <b>Major bleeding complications, n (%)</b> | 499 (0.7%)                            | 304 (0.5%)                                           | 195 (2.5%)                                       | < 0.001        |
| RBC transfusion, n (%)                     | 448 (0.6%)                            | 264 (0.4%)                                           | 184 (2.3%)                                       | < 0.001        |
| Invasive hemostasis, n (%)                 | 93 (0.1%)                             | 68 (0.1%)                                            | 25 (0.3%)                                        | < 0.001        |
| Massive RBC transfusion, n (%)             | 162 (0.2%)                            | 51 (0.1%)                                            | 111 (1.4%)                                       | < 0.001        |

Abbreviation: RBC, red blood cell.

Footnote: Some patients have received both RBC transfusion and invasive hemostasis.

Thus, they are not mutually exclusive.

**Table S4. Multivariable regression analysis for major bleeding complications (when patients with anemia defined using *ICD-10* codes on admission were excluded)**

| Generalized Estimating Equations<br>(Group variable: hospital code) | Multivariable Analysis |         |
|---------------------------------------------------------------------|------------------------|---------|
|                                                                     | RR (95% CI)            | p-value |
| <b>Diabetes mellitus</b>                                            | 2.63 (2.12-3.28)       | < 0.001 |
| <b>Age, years</b>                                                   | 1.03 (1.03-1.04)       | < 0.001 |
| <b>Female, sex</b>                                                  | 1.48 (1.23-1.79)       | < 0.001 |
| <b>BMI (kg/m<sup>2</sup>)</b>                                       | See Figure S3          |         |
| <b>Main diagnosis</b>                                               |                        |         |
| AKI or RPGN                                                         | 3.96 (3.09-5.08)       | < 0.001 |
| Nephrosis                                                           | 0.87 (0.66-1.15)       | 0.33    |
| Others                                                              | 1 (base)               |         |
| <b>Presence of CKD</b>                                              | 2.59 (2.11-3.17)       | < 0.001 |
| <b>Hospital volume</b>                                              |                        |         |
| 1–24/year                                                           | 1 (base)               |         |
| 25–44/year                                                          | 0.88 (0.70-1.11)       | 0.29    |
| ≥ 45/year                                                           | 0.91 (0.70-1.17)       | 0.44    |
| <b>Academic hospital</b>                                            | 1.47 (1.18-1.84)       | 0.001   |
| <b>Fiscal year period</b>                                           |                        | 0.13    |
| 2010–2015                                                           | 1 (base)               |         |
| 2016–2017                                                           | 0.86 (0.70-1.05)       |         |
| <b>ADL</b>                                                          |                        | < 0.001 |
| Dependent                                                           | 2.62 (1.95-3.54)       |         |
| Independent                                                         | 1 (base)               |         |
| <b>Corticosteroid use</b>                                           | 1.37 (0.97-1.93)       | 0.075   |
| <b>Immunosuppressant use</b>                                        | 1.09 (0.42-2.83)       | 0.86    |
| <b>Antithrombotic use</b>                                           | 1.27 (0.80-2.04)       | 0.31    |

Abbreviations: RR, relative risk; BMI, body mass index (calculated as weight in kilograms divided by the square of height in meters); AKI, acute kidney injury; RPGN, rapidly progressive glomerulonephritis; ADL, activities of daily living.

**Figure S3. Cubic spline estimation of body mass index and relative risk of major bleeding complications (when patients with anemia defined using *ICD-10* codes on admission were excluded)**

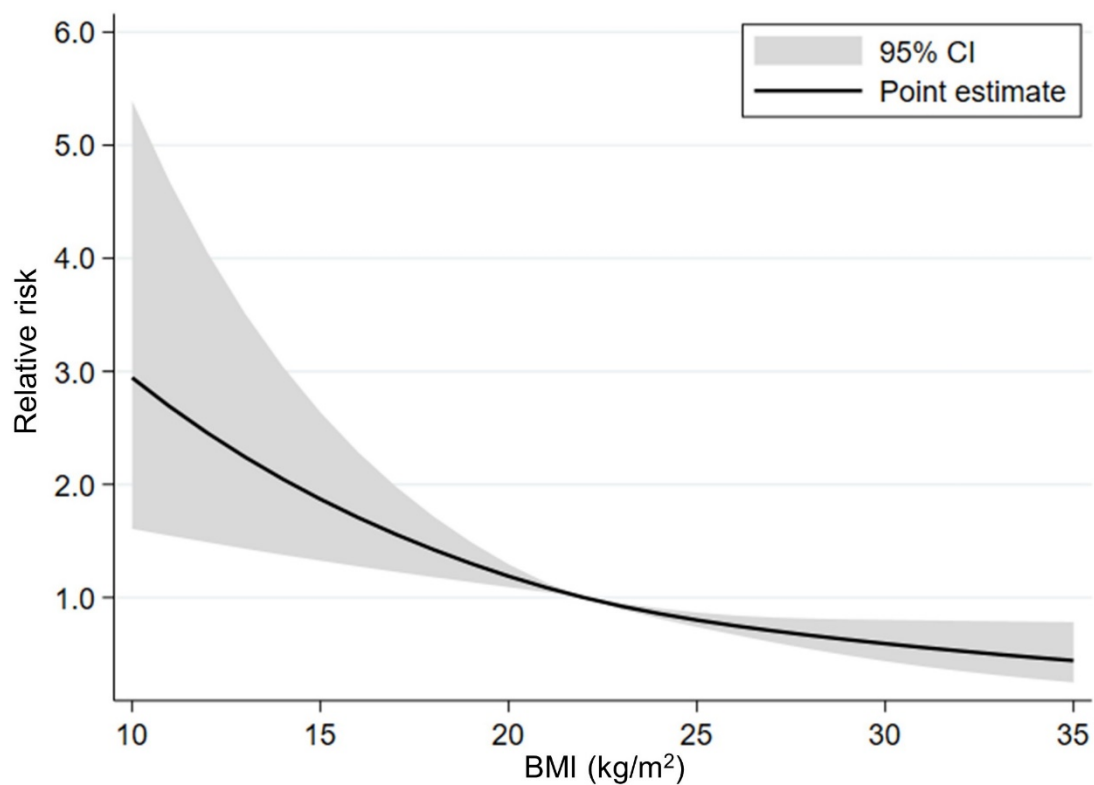

The horizontal axis denotes the body mass index (BMI, kg/m<sup>2</sup>), and the vertical axis denotes the relative risk of major bleeding complications.



**Table S5. Baseline characteristics of patients with and without diabetes (when diabetes was defined using ICD-10 codes)**

|                                     | Total patients<br>(n = 76302) | Patients without<br>diabetes<br>(n = 65101) | Patients with<br>diabetes<br>(n = 11201) | p-value |
|-------------------------------------|-------------------------------|---------------------------------------------|------------------------------------------|---------|
| <b>Age, years</b>                   | 50 (35–65)                    | 47 (33–63)                                  | 63 (50–71)                               | < 0.001 |
| <b>Male, n (%)</b>                  | 39555 (51.8%)                 | 32557 (50.0%)                               | 6998 (62.5%)                             | < 0.001 |
| <b>BMI (kg/m<sup>2</sup>)</b>       |                               |                                             |                                          | < 0.001 |
| BMI < 18.5, n (%)                   | 6409 (8.4%)                   | 5896 (9.1%)                                 | 513 (4.6%)                               |         |
| 18.5 ≤ BMI < 23.0, n (%)            | 32871 (43.1%)                 | 29316 (45.0%)                               | 3555 (31.7%)                             |         |
| 23.0 ≤ BMI < 25.0, n (%)            | 14330 (18.8%)                 | 12032 (18.5%)                               | 2298 (20.5%)                             |         |
| 25.0 ≤ BMI < 30.0, n (%)            | 17608 (23.1%)                 | 14056 (21.6%)                               | 3552 (31.7%)                             |         |
| BMI ≥ 30.0, n (%)                   | 5084 (6.7%)                   | 3801 (5.8%)                                 | 1283 (11.5%)                             |         |
| <b>Main diagnosis</b>               |                               |                                             |                                          | < 0.001 |
| AKI or RPGN, n (%)                  | 3425 (4.5%)                   | 2544 (3.9%)                                 | 881 (7.9%)                               |         |
| Nephrosis, n (%)                    | 13708 (18.0%)                 | 10606 (16.3%)                               | 3102 (27.7%)                             |         |
| Others, n (%)                       | 59169 (77.5%)                 | 51951 (79.8%)                               | 7218 (64.4%)                             |         |
| <b>Presence of CKD, n (%)</b>       | 8837 (11.6%)                  | 6811 (10.5%)                                | 2026 (18.1%)                             | < 0.001 |
| <b>Hospital volume per year</b>     |                               |                                             |                                          | 0.03    |
| 1–24 cases, n (%)                   | 28808 (37.8%)                 | 24694 (37.9%)                               | 4114 (36.7%)                             |         |
| 25–44 cases, n (%)                  | 25197 (33.0%)                 | 21478 (33.0%)                               | 3719 (33.2%)                             |         |
| ≥ 45 cases, n (%)                   | 22297 (29.2%)                 | 18929 (29.1%)                               | 3368 (30.1%)                             |         |
| <b>Academic hospital, n (%)</b>     | 19831 (26.0%)                 | 17178 (26.4%)                               | 2653 (23.7%)                             | < 0.001 |
| <b>Fiscal year period</b>           |                               |                                             |                                          | < 0.001 |
| 2010–2015, n (%)                    | 53405 (70.0%)                 | 46013 (70.7%)                               | 7392 (66.0%)                             |         |
| 2016–2017, n (%)                    | 22897 (30.0%)                 | 19088 (29.3%)                               | 3809 (34.0%)                             |         |
| <b>ADL</b>                          |                               |                                             |                                          | < 0.001 |
| Independent                         | 75145 (98.5%)                 | 64230 (98.7%)                               | 10915 (97.4%)                            |         |
| Dependent                           | 1157 (1.5%)                   | 871 (1.3%)                                  | 286 (2.6%)                               |         |
| <b>Corticosteroid use, n (%)</b>    | 2365 (3.1%)                   | 1866 (2.9%)                                 | 499 (4.5%)                               | < 0.001 |
| <b>Immunosuppressant use, n (%)</b> | 802 (1.1%)                    | 694 (1.1%)                                  | 108 (1.0%)                               | 0.33    |
| <b>Antithrombotic use, n (%)</b>    | 1016 (1.3%)                   | 752 (1.2%)                                  | 264 (2.4%)                               | < 0.001 |

Abbreviations: BMI, body mass index (calculated as weight in kilograms divided by the square of height in meters); AKI, acute kidney injury; RPGN, rapidly progressive glomerulonephritis; ADL, activities of daily living.

**Table S6. Major bleeding complications of patients with and without diabetes  
(when diabetes was defined using ICD-10 codes)**

|                                            | <b>Total patients<br/>(n = 76302)</b> | <b>Patients without<br/>diabetes<br/>(n = 65101)</b> | <b>Patients with<br/>diabetes<br/>(n = 11201)</b> | <b>p-value</b> |
|--------------------------------------------|---------------------------------------|------------------------------------------------------|---------------------------------------------------|----------------|
| <b>Major bleeding complications, n (%)</b> | 678 (0.9%)                            | 495 (0.8%)                                           | 183 (1.6%)                                        | < 0.001        |
| RBC transfusion, n (%)                     | 622 (0.8%)                            | 447 (0.7%)                                           | 175 (1.6%)                                        | < 0.001        |
| Invasive hemostasis, n (%)                 | 109 (0.1%)                            | 90 (0.1%)                                            | 19 (0.2%)                                         | < 0.001        |
| Massive RBC transfusion, n (%)             | 201 (0.3%)                            | 145 (0.2%)                                           | 56 (0.5%)                                         | < 0.001        |

Abbreviation: RBC, red blood cell.

Footnote: Some patients have received both RBC transfusion and invasive hemostasis.

Thus, they are not mutually exclusive.

**Table S7. Multivariable regression analysis for major bleeding complications (when diabetes was defined using ICD-10 codes)**

| Generalized Estimating Equations<br>(Group variable: hospital code) | Multivariable Analysis |         |
|---------------------------------------------------------------------|------------------------|---------|
|                                                                     | RR (95% CI)            | p-value |
| <b>Diabetes mellitus</b>                                            | 1.34 (1.11-1.62)       | 0.002   |
| <b>Age, years</b>                                                   | 1.04 (1.03-1.05)       | < 0.001 |
| <b>Female, sex</b>                                                  | 1.48 (1.25-1.75)       | < 0.001 |
| <b>BMI (kg/m<sup>2</sup>)</b>                                       | See Figure S4          |         |
| <b>Main diagnosis</b>                                               |                        |         |
| AKI or RPGN                                                         | 4.57 (3.79-5.52)       | < 0.001 |
| Nephrosis                                                           | 0.97 (0.76-1.23)       | 0.79    |
| Others                                                              | 1 (base)               |         |
| <b>Presence of CKD</b>                                              | 2.62 (2.21-3.11)       | < 0.001 |
| <b>Hospital volume</b>                                              |                        |         |
| 1–24/year                                                           | 1 (base)               |         |
| 25–44/year                                                          | 0.87 (0.71-1.05)       | 0.15    |
| ≥ 45/year                                                           | 0.87 (0.72-1.07)       | 0.19    |
| <b>Academic hospital</b>                                            | 1.46 (1.20-1.77)       | < 0.001 |
| <b>Fiscal year period</b>                                           |                        |         |
| 2010–2015                                                           | 1 (base)               |         |
| 2016–2017                                                           | 0.92 (0.78-1.09)       |         |
| <b>ADL</b>                                                          |                        | < 0.001 |
| Dependent                                                           | 2.75 (2.14-3.54)       |         |
| Independent                                                         | 1 (base)               |         |
| <b>Corticosteroid use</b>                                           | 1.65 (1.23-2.22)       | 0.001   |
| <b>Immunosuppressant use</b>                                        | 1.11 (0.51-2.44)       | 0.79    |
| <b>Antithrombotic use</b>                                           | 1.25 (0.81-1.91)       | 0.31    |

Abbreviations: RR, relative risk; BMI, body mass index (calculated as weight in kilograms divided by the square of height in meters); AKI, acute kidney injury; RPGN, rapidly progressive glomerulonephritis; ADL, activities of daily living.

**Figure S4. Cubic spline estimation of body mass index and relative risk of major bleeding complications (when diabetes was defined using *ICD-10* codes)**

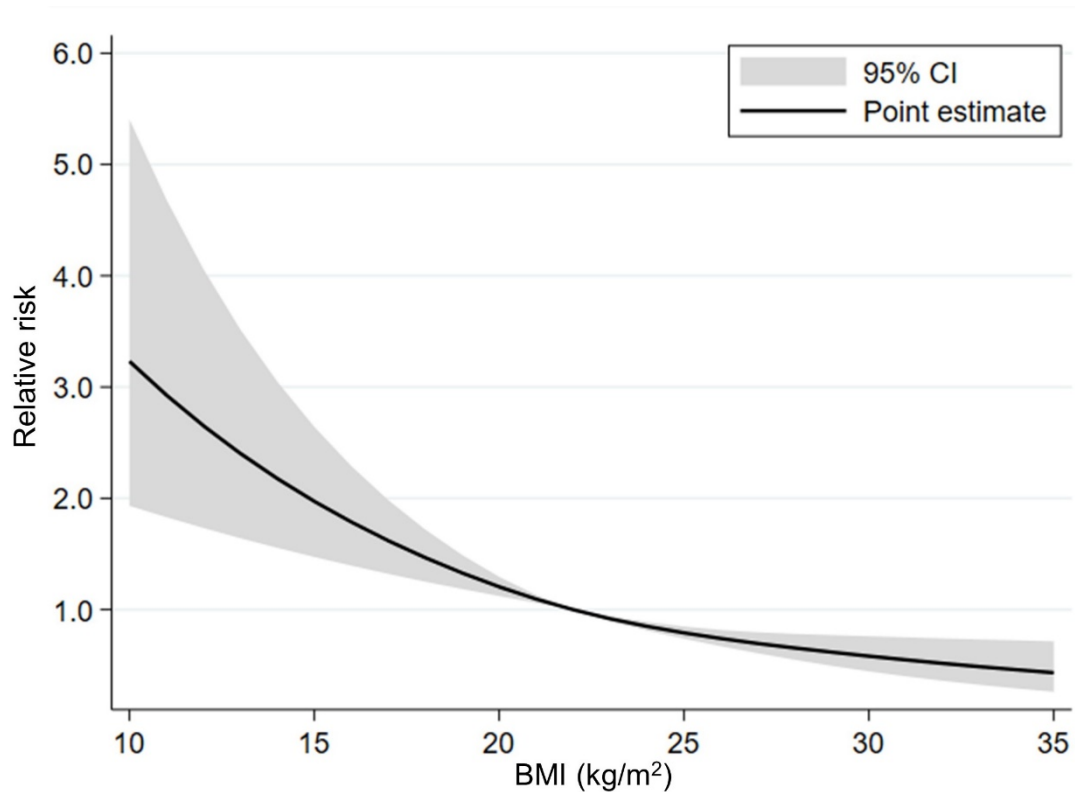

The horizontal axis denotes the body mass index (BMI, kg/m<sup>2</sup>), and the vertical axis denotes the relative risk of major bleeding complications.

**Table S8. Baseline characteristics of the subgroups of patients with diabetes**

|                                     | Single-agent<br>(n = 2562) | Multi-agent or Insulin<br>(n = 5683) | p-value |
|-------------------------------------|----------------------------|--------------------------------------|---------|
| <b>Age, years</b>                   | 64 (53-72)                 | 65 (55-72)                           | < 0.001 |
| <b>Male, n (%)</b>                  | 1545 (60.3%)               | 3449 (60.7%)                         | 0.74    |
| <b>BMI (kg/m<sup>2</sup>)</b>       |                            |                                      | 0.40    |
| BMI < 18.5, n (%)                   | 130 (5.1%)                 | 299 (5.3%)                           |         |
| 18.5 ≤ BMI < 23.0, n (%)            | 824 (32.2%)                | 1926 (33.9%)                         |         |
| 23.0 ≤ BMI < 25.0, n (%)            | 552 (21.5%)                | 1135 (20.0%)                         |         |
| 25.0 ≤ BMI < 30.0, n (%)            | 795 (31.0%)                | 1734 (30.5%)                         |         |
| BMI ≥ 30.0, n (%)                   | 261 (10.2%)                | 589 (10.4%)                          |         |
| <b>Main diagnosis</b>               |                            |                                      | < 0.001 |
| AKI or RPGN, n (%)                  | 210 (8.2%)                 | 822 (14.5%)                          |         |
| Nephrosis, n (%)                    | 865 (33.8%)                | 2027 (35.7%)                         |         |
| Others, n (%)                       | 1487 (58.0%)               | 2834 (49.9%)                         |         |
| <b>Presence of CKD, n (%)</b>       | 532 (20.8%)                | 1027 (18.1%)                         | 0.004   |
| <b>Hospital volume per year</b>     |                            |                                      | 0.002   |
| 1–24 cases, n (%)                   | 904 (35.3%)                | 2190 (38.5%)                         |         |
| 25–44 cases, n (%)                  | 862 (33.6%)                | 1923 (33.8%)                         |         |
| ≥ 45 cases, n (%)                   | 796 (31.1%)                | 1570 (27.6%)                         |         |
| <b>Academic hospital, n (%)</b>     | 740 (28.9%)                | 1434 (25.2%)                         | < 0.001 |
| <b>Fiscal year period</b>           |                            |                                      | 0.002   |
| 2010–2015, n (%)                    | 1490 (58.2%)               | 3513 (61.8%)                         |         |
| 2016–2017, n (%)                    | 1072 (41.8%)               | 2170 (38.2%)                         |         |
| <b>ADL</b>                          |                            |                                      | < 0.001 |
| Independent                         | 2498 (97.5%)               | 5409 (95.2%)                         |         |
| Dependent                           | 64 (2.5%)                  | 274 (4.8%)                           |         |
| <b>Corticosteroid use, n (%)</b>    | 143 (5.6%)                 | 478 (8.4%)                           | < 0.001 |
| <b>Immunosuppressant use, n (%)</b> | 44 (1.7%)                  | 67 (1.2%)                            | 0.05    |
| <b>Antithrombotic use, n (%)</b>    | 76 (3.0%)                  | 232 (4.1%)                           | 0.013   |

Abbreviations: BMI, body mass index (calculated as weight in kilograms divided by the square of height in meters); AKI, acute kidney injury; RPGN, rapidly progressive glomerulonephritis; ADL, activities of daily living.

**Table S9. Multivariable regression analysis for major bleeding complications in the subgroup of patients with diabetes**

| Generalized Estimating Equations<br>(Group variable: hospital code) | Multivariable Analysis |         |
|---------------------------------------------------------------------|------------------------|---------|
|                                                                     | RR (95% CI)            | p-value |
| <b>Treatment regimen for diabetes</b>                               |                        | 0.002   |
| Single-agent                                                        | 1 (base)               |         |
| Multi-agent or insulin use                                          | 1.57 (1.18-2.10)       |         |
| <b>Age, years</b>                                                   | 1.03 (1.02-1.04)       | < 0.001 |
| <b>Female, sex</b>                                                  | 1.53 (1.20-1.94)       | 0.001   |
| <b>BMI (kg/m<sup>2</sup>)</b>                                       | See Figure S5          |         |
| <b>Main diagnosis</b>                                               |                        |         |
| AKI or RPGN                                                         | 2.20 (1.72-2.82)       | < 0.001 |
| Nephrosis                                                           | 0.55 (0.39-0.77)       | 0.001   |
| Others                                                              | 1 (base)               |         |
| <b>Presence of CKD</b>                                              | 2.09 (1.61-2.70)       | < 0.001 |
| <b>Hospital volume</b>                                              |                        |         |
| 1–24/year                                                           | 1 (base)               |         |
| 25–44/year                                                          | 1.00 (0.75-1.33)       | 0.99    |
| ≥ 45/year                                                           | 0.71 (0.51-1.00)       | 0.047   |
| <b>Academic hospital</b>                                            | 1.23 (0.91-1.67)       | 0.18    |
| <b>Fiscal year period</b>                                           |                        | 0.23    |
| 2010–2015                                                           | 1 (base)               |         |
| 2016–2017                                                           | 0.85 (0.65-1.11)       |         |
| <b>ADL</b>                                                          |                        | < 0.001 |
| Dependent                                                           | 2.14 (1.53-3.00)       |         |
| Independent                                                         | 1 (base)               |         |
| <b>Corticosteroid use</b>                                           | 1.36 (0.95-1.96)       | 0.096   |
| <b>Immunosuppressant use</b>                                        | 1.04 (0.33-3.25)       | 0.95    |
| <b>Antithrombotic use</b>                                           | 1.25 (0.75-2.10)       | 0.39    |

Abbreviations: RR, relative risk; BMI, body mass index (calculated as weight in kilograms divided by the square of height in meters); AKI, acute kidney injury; RPGN, rapidly progressive glomerulonephritis; ADL, activities of daily living.

**Figure S5. Cubic spline estimation of body mass index and relative risk of major bleeding complications in patients with diabetes**

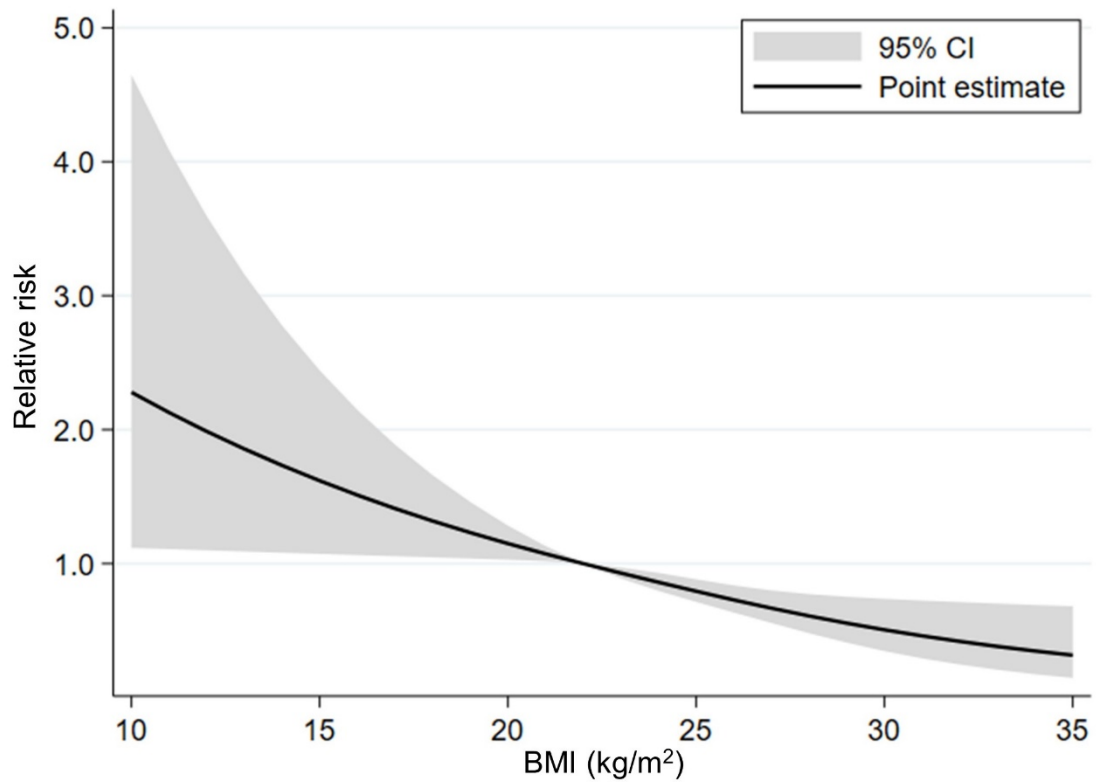

The horizontal axis denotes the body mass index (BMI, kg/m<sup>2</sup>), and the vertical axis denotes the relative risk of major bleeding complications in patients with diabetes.
